# Supplementary material for: An International Standard Set of Patient-Centered Outcome Measures After Stroke
Source: PubMed Central journal article supplement — Stroke. 2015 Dec 28;47(1):180–6. doi: 10.1161/STROKEAHA.115.010898 (PMC4689178; doi:10.1161/strokeaha.115.010898), 2015-12-28
Supplement: str-47-180-s001.pdf [file str-47-180-s001.pdf]

**SUPPLEMENTAL MATERIAL**

An International Standard Set of Patient-Centered Outcome Measures After Stroke

Supplemental Table I. Stroke Working Group member specialties and register/institutional affiliations

| <b>Country</b>  | <b>Clinical Specialty</b>                                        | <b>Name</b>                         | <b>Register/Institutional affiliation</b>                                                                                                                                                                                                                                                                                                   |
|-----------------|------------------------------------------------------------------|-------------------------------------|---------------------------------------------------------------------------------------------------------------------------------------------------------------------------------------------------------------------------------------------------------------------------------------------------------------------------------------------|
| Australia       | Neuro-Rehabilitation                                             | Julie Bernhardt, PhD                | The Florey Institute of Neuroscience and Mental Health                                                                                                                                                                                                                                                                                      |
| Brazil          | Vascular Neurology                                               | Sheila C.O. Martins, MD, PhD        | Hospital Moinhos de Vento, Brazil National Stroke Registry                                                                                                                                                                                                                                                                                  |
| Canada          | Vascular Neurology                                               | Eric E. Smith, MD, MPH, FRCPC, FAHA | Hotchkiss Brain Institute and Department of Clinical Neurosciences, University of Calgary                                                                                                                                                                                                                                                   |
| Canada          | Vascular Neurology                                               | Frank L. Silver, MD, FRCPC          | University of Toronto, Ontario Stroke Registry                                                                                                                                                                                                                                                                                              |
| Canada          | Stroke Nursing                                                   | Patrice Lindsay, RN, PhD            | Heart and Stroke Foundation of Canada, Ontario Stroke Registry                                                                                                                                                                                                                                                                              |
| China           | Vascular Neurology                                               | Liping Liu, MD                      | Capital Medical University, Beijing Tiantan Hospital                                                                                                                                                                                                                                                                                        |
| The Netherlands | Neuro-Rehabilitation                                             | Gerard Ribbers, MD, PhD             | Erasmus University MC, Rijndam Rehabilitation Center                                                                                                                                                                                                                                                                                        |
| Sweden          | Vascular Neurology                                               | Bo Norrving, MD, PhD                | Department of Clinical Sciences, Neurology, Lund University, Swedish Stroke Register (Riksstroke)                                                                                                                                                                                                                                           |
| UK              | Stroke Occupational Therapy                                      | Stephanie Gething, Dip COT, MSc     | Advanced Practitioner Occupational Therapist, Aneurin Bevan University Health Board                                                                                                                                                                                                                                                         |
| UK              | Vascular Neurology                                               | Charlie Davie, MD, FRCP             | UCLPartners Academic Health Science Network, Royal Free London NHS Foundation Trust                                                                                                                                                                                                                                                         |
| USA             | Vascular Neurology                                               | Lee H. Schwamm, MD                  | Department of Neurology, Massachusetts General Hospital, Harvard Medical School, American Heart Association Get With The Guidelines-Stroke registry, Centers for Disease Control and Prevention Paul Coverdell National Acute Stroke Registry, Joint Commission Primary & Comprehensive Stroke Center Certification Technical Expert Panels |
| USA             | Neurology                                                        | Joel Salinas, MD, MBA               | Department of Neurology, Massachusetts General Hospital, Harvard Medical School,                                                                                                                                                                                                                                                            |
| USA             | Senior Medical Officer and Deputy Associate Director for Science | Mary G. George, MD, MSPH, FACS      | Paul Coverdell National Acute Stroke Registry, Centers for Disease Control and Prevention Division for Heart Disease and Stroke Prevention                                                                                                                                                                                                  |
| USA             | Vascular Neurology                                               | Adam G. Kelly, MD                   | University of Rochester Medical Center                                                                                                                                                                                                                                                                                                      |
| USA             | <b>Stroke Patient Representative</b>                             | Teri Ackerson, SCRN, BSN            | American Heart Association/American Stroke Association, Liberty Hospital                                                                                                                                                                                                                                                                    |
| USA             | Vascular Neurology                                               | Linda S. Williams, MD               | Veteran's Administration Stroke QUERI Project                                                                                                                                                                                                                                                                                               |
| USA             | Cardiovascular Nursing and                                       | Louise Morgan, MSN, CPHQ            | American Heart Association/American Stroke Association, Get With The Guidelines-Stroke                                                                                                                                                                                                                                                      |

|  |                                                                                                |  |          |
|--|------------------------------------------------------------------------------------------------|--|----------|
|  | Director,<br>International Quality<br>Improvement;<br><b>Stroke Patient<br/>Representative</b> |  | Registry |
|--|------------------------------------------------------------------------------------------------|--|----------|

Supplemental Table II. Voting percentages of modified Delphi method by working group members by individual outcome domains. A majority vote was required for consideration for inclusion.

|                   | <b>Outcome</b>                                            | <b>Final vote in favor of inclusion (final vote)</b> |
|-------------------|-----------------------------------------------------------|------------------------------------------------------|
| <b>Included</b>   | All-cause mortality                                       | 100%                                                 |
|                   | Patient reported general health status                    | 100%                                                 |
|                   | Global patient reported health-related quality of life    | 100%                                                 |
|                   | Mood                                                      | 100%                                                 |
|                   | Self-care and grooming                                    | 100%                                                 |
|                   | Mobility                                                  | 100%                                                 |
|                   | Symptomatic intracranial hemorrhage after ischemic stroke | 100%                                                 |
|                   | Pain and other unpleasant sensations                      | 91%                                                  |
|                   | Ability to return to usual activities                     | 91%                                                  |
|                   | Global cognitive function                                 | 90%                                                  |
|                   | Readmission for ischemic stroke                           | 90%                                                  |
|                   | Readmission for ICH                                       | 90%                                                  |
|                   | Feeding                                                   | 82%                                                  |
|                   | Ability to communicate (including nonverbal means)        | 82%                                                  |
|                   | Social participation                                      | 73%                                                  |
|                   | Fatigue                                                   | 70%                                                  |
| Smoking cessation | 70%                                                       |                                                      |
| <b>Excluded</b>   | Stroke due to carotid artery intervention                 | 57%                                                  |
|                   | Major systemic hemorrhage                                 | 50%                                                  |
|                   | Early neurological worsening                              | 44%                                                  |
|                   | Hospital acquired pneumonia                               | 43%                                                  |
|                   | Sexual function                                           | 40%                                                  |
|                   | Effort required to return to usual activities             | 30%                                                  |
|                   | Sleep quality                                             | 20%                                                  |

Supplemental Table III. Summary of the demographic data elements, risk adjustment variables and other covariates included in the ICHOM Standard Set for stroke, and the recommended data source and timing.

|                                     | <b>Measure</b>                                        | <b>Timing</b>          | <b>Data Source</b>                 |
|-------------------------------------|-------------------------------------------------------|------------------------|------------------------------------|
| <b>General patient demographics</b> |                                                       |                        |                                    |
| Age                                 | What is your date of birth?                           | Admission <sup>a</sup> | Administrative or patient-reported |
| Sex                                 | Please indicate your sex at birth                     | Admission              | Administrative or patient-reported |
| Race/Ethnicity                      | To be determined by country                           | Admission              | Patient-reported                   |
| Prestroke functional status         | Are you able to ambulate?                             | Admission              | Medical record or patient-reported |
|                                     | Do you receive help from anybody to go to the toilet? |                        |                                    |
|                                     | Do you receive help with dressing/undressing?         |                        |                                    |
| Living location                     | Where were you staying prior to your stroke or TIA?   | Admission              | Patient-reported                   |
|                                     | Where are you staying now?                            | 90 days <sup>b</sup>   | Patient-reported                   |
| Living alone                        | Do you live alone?                                    | Admission and 90 days  | Patient-reported                   |
| <b>Stroke type and severity</b>     |                                                       |                        |                                    |
| Stroke severity                     | National Institutes of Health Stroke Scale (NIHSS)    | Admission              | Medical record                     |
| Stroke severity                     | What is the patient's level of consciousness?         | Admission              | Medical record                     |
| Stroke type                         | Indicate stroke type                                  | Admission              | Medical record                     |
| Duration of symptoms                | Indicate the duration of symptoms                     | Admission              | Patient-reported                   |
| <b>Vascular and systemic</b>        |                                                       |                        |                                    |

|                               |                                                                                                                                    |                                      |                                    |
|-------------------------------|------------------------------------------------------------------------------------------------------------------------------------|--------------------------------------|------------------------------------|
| Prior stroke                  | Prior to this hospitalization, have you ever been told by a doctor that you have had a stroke?                                     | Admission                            | Medical record or patient-reported |
| Prior TIA                     | Have you ever been told by a doctor that you have had a transient ischemic attack (this is sometimes called a TIA or mini-stroke)? | Admission                            | Medical record or patient-reported |
| Prior MI                      | Have you ever been told by a doctor that you have had a heart attack (this is sometimes called a myocardial infarction, or MI)?    | Admission                            | Medical record or patient-reported |
| Coronary artery disease       | Have you ever been told by your doctor that you have coronary artery disease?                                                      | Admission                            | Medical record or patient-reported |
| Atrial fibrillation           | Have you ever been told by your doctor that you have atrial fibrillation?                                                          | Admission                            | Medical record or patient-reported |
| Diabetes mellitus             | Have you ever been told by your doctor that you have diabetes?                                                                     | Admission                            | Medical record or patient-reported |
| Hypertension                  | Have you ever been told by a doctor that you have high blood pressure (this is sometimes called hypertension)?                     | Admission                            | Medical record or patient-reported |
| Hyperlipidemia                | Have you ever been told by your doctor that you have high cholesterol (this is sometimes called hyperlipidemia or dyslipidemia)?   | Admission                            | Medical record or patient-reported |
| Smoking                       | Do you currently smoke, or have you smoked over the past year?                                                                     | Admission                            | Patient-reported                   |
| Alcohol use                   | Do you drink more than one standard alcoholic drink a day?                                                                         | Admission                            | Patient-reported                   |
| <b>Treatment/care related</b> |                                                                                                                                    |                                      |                                    |
| Length of stay                | Date of admission for index event and date of discharge from acute care hospital                                                   | Admission and Discharge <sup>c</sup> | Administrative data                |
| Diagnostic process            | Indicate how the diagnosis was made                                                                                                | Discharge                            | Medical record                     |

|                              |                                                                                                                                                                                                                                                              |           |                     |
|------------------------------|--------------------------------------------------------------------------------------------------------------------------------------------------------------------------------------------------------------------------------------------------------------|-----------|---------------------|
| Rehabilitation               | <p>Did the acute inpatient care include dedicated stroke rehabilitation?</p> <p>Did the post-acute care (hospital-based or not) include dedicated stroke rehabilitation, either hospital-based or outpatient/home-based?</p>                                 | Discharge | Administrative data |
| Discharge destination        | What type of place was the patient discharged to?                                                                                                                                                                                                            | Discharge | Administrative data |
| Comfort care (optional item) | At any point in the hospitalization, did the goals of care shift from treatment and recovery to emphasize comfort? ["Comfort care" is defined as care for a patient who is dying that helps or comforts with the goal of preventing or relieving suffering.] | Discharge | Administrative data |

---

<sup>a</sup> Admission for index event

<sup>b</sup> 90 days after admission for index event within a 30-day window (i.e., 90 to 120 days after index admission)

<sup>c</sup> Discharge or 7 days after admission for index event (whichever occurs first)

---
